# Supplementary material for: Two types of interneurons in the mouse lateral geniculate nucleus are characterized by different h-current density
Source: PubMed Central journal article supplement (PMC4848471; doi:10.1038/srep24904), 2016-04-28
Supplement: srep24904-s1.pdf [file srep24904-s1.pdf]

## Supplementary Information

### Two types of interneurons in the mouse lateral geniculate nucleus are characterized by different h-current density

Michael Leist<sup>1,#</sup>, Maia Datunashvili<sup>1,2,#</sup>, Tatyana Kanyshkova<sup>1</sup>, Mehrnoush Zobeiri<sup>1</sup>, Ania Aissaoui<sup>1</sup>, Manuela Cerina<sup>3</sup>, Maria Novella Romanelli<sup>4</sup>, Hans-Christian Pape<sup>1</sup>, Thomas Budde\*<sup>1</sup>

<sup>1</sup>Institut für Physiologie I, Westfälische Wilhelms-Universität, Robert-Koch-Str. 27a, 48149 Münster, Germany.

<sup>2</sup>Laboratory of Sleep-Wakefulness Cycle Studies, Faculty of Arts and Science, Ilia State University, Kakutsa Cholokashvili Ave 3/5, Tbilisi 0162, Georgia.

<sup>3</sup>Institut für Physiologie I – Neuropathophysiologie, Albert-Schweitzer Campus 1, 48149 Münster, Germany.

<sup>4</sup>Department of Neurosciences, Psychology, Drug Research and Child Health, University of Florence, Via Ugo Schiff 6, 50019 Sesto Fiorentino, Italy.

#Authors contributed equally

\*Corresponding author

#### A) Supplementary Methods

##### 1) Determination of AP parameters

The following parameters obtained from current clamp recordings were analyzed: maximum potential reached by the AP during the depolarizing phase (MaxY); minimum potential following a single AP during the repolarization phase (MinY), thus representing the value of the fast afterhyperpolarization (fAHP); duration of the AP determined at the threshold level (Dur); integral of the AP with the threshold level used as baseline (Integr); rise time of the AP determined between the threshold level and MaxY (MAXdt); duration from the first threshold

crossing to MinY (MINdt); depolarization rate of the AP calculated by the equation:  $(MaxY - V_{\text{thresh}}) / MAXdt$ ; AP repolarization rate of the AP calculated by the equation:  $(MaxY - MinY) / MINdt$  (note that MinY has negative values). The firing frequency was deduced by calculating the dividing the number of AP induced by a depolarizing current step by the pulse length.

## **2) Sequences of primers used for multiplex and nested PCR**

The following primers were used:

### *Multiplex primer*

*HCN1 (nucleotides985-1883); accession No. AJ225123:*

for: 5'-TCTTGC GGTTATTAC GCC TT-3';

rev: 5'-TTT TCT TGC CTA TCC GAT CG-3'.

*HCN2 (nucleotides810-1774) accession No.AJ225122:*

for: 5'-TAC TTG CGT ACG TGG TTC GT-3';

rev:5'-GAAATAGGAGCCATC CGACA-3'.

*HCN3 (nucleotides 1242-2322); accession No. AJ225124:*

for: 5'-CGC ATC CAC GAG TAC TAC GA-3';

rev: 5'-CAC TTC CAG AGC CTT TAC GC-3'.

*HCN4 (nucleotides 295-1314); accession No. AF064874:*

for: 5'-TCT GAT CAT CAT ACC CGT GG-3';

rev:5'-GAA GAC CTC GAA ACG CAA CT-3'.

### *Nested primer*

*HCN1 (nucleotides 1612-1902, 290 bp); accession No. AJ225123:*

for: 5'-CTC TTT TTG CTA ACG CCG AT-3';

rev: 5'-CAT TGA AAT TGTCCACCGAA-3'.

*HCN2 (nucleotides 1181-1550, 369 bp); accession No. AJ225122:*

for: 5'-GTG GAG CGA GCT CTA CTC GT-3';

rev: 5'-GTT CAC AAT CTC CTC ACG CA-3'.

*HCN3 (nucleotides 1808-2040, 232 bp); accession No. AJ225124:*

for: 5'-GCA GCA TTT GGT ACA ACA CG-3';

rev: 5'-AGC GTC TAG CAG ATC GAG CT-3'.

*HCN4 (nucleotides 1110-1278, 168 bp); accession No. AF064874:*

for: 5'-GAC AGC GCA TCC ATG ACT AC-3';

rev: 5'-ACA AAG TTG GGA TCTGCG TT-3'.

## B) Supplementary Figures

**Figure S1:** Reversal of  $I_h$  in small and large IN in dLGN.

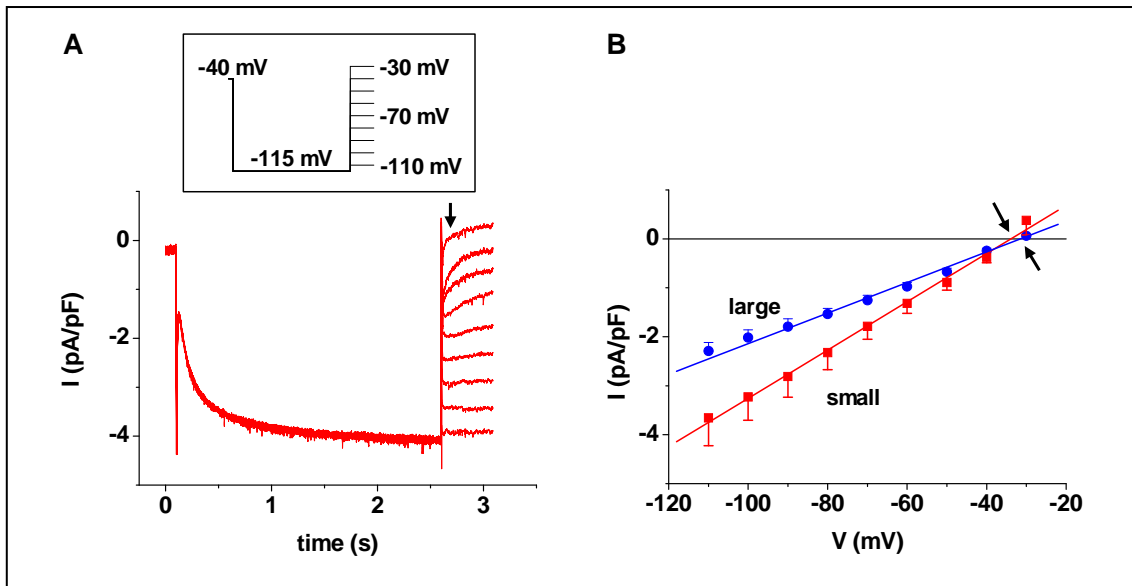

(A) Current traces evoked by a hyperpolarizing step to -115 mV from a holding potential of -40 mV (see inset) in a small IN. The post-step test potential was varied between -110 and -30 mV. Tail current amplitudes 100 ms after the onset of the test potential were measured (see arrow). (B) Plots of tail current amplitudes vs. test potential for small (red squares) and large (blue circles) IN. The solid lines represent the best fitting straight lines with zero current a potential of -33 mV and -31 mV for small and large IN, respectively (see arrows).

**Figure S2:** Properties of  $I_h$  in dLGN TC neurons of EGFP-expressing mice.

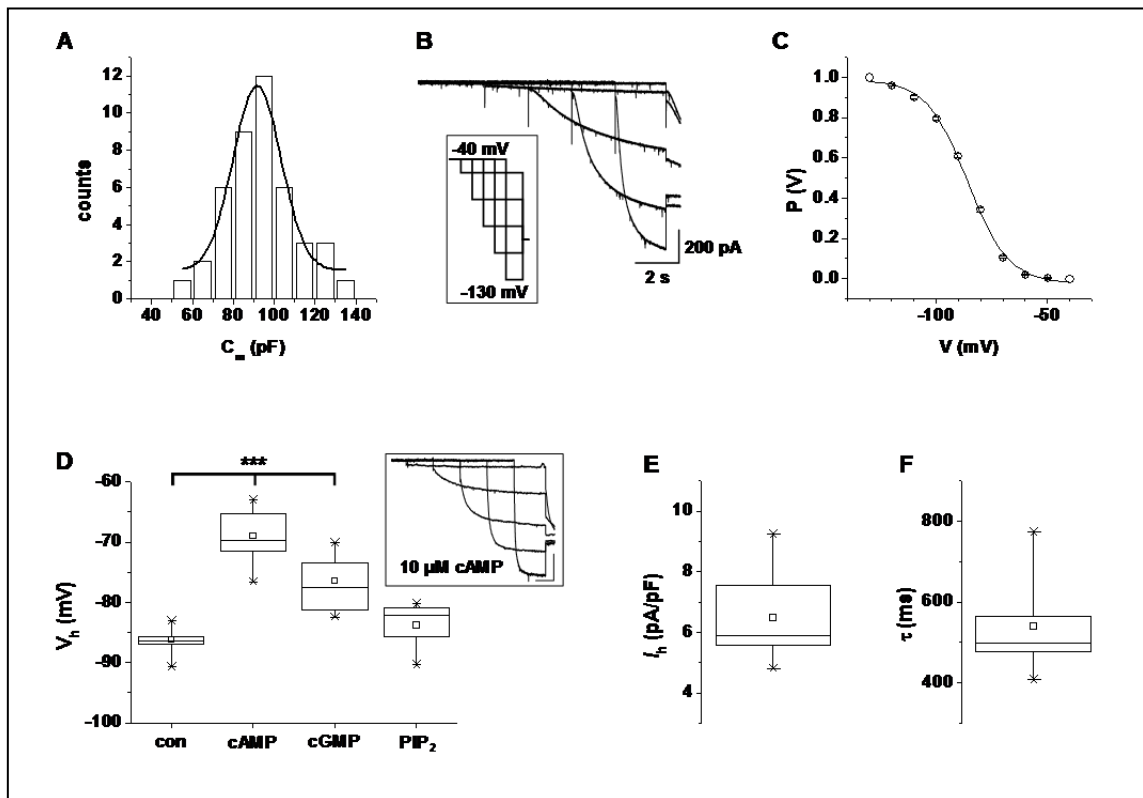

(A) Frequency distribution of  $C_m$  of TC neurons recorded under voltage clamp conditions. The ordinate represents the number of cells within each 10 pF class along the abscissa. Note the unimodal  $C_m$  distribution for the total TC neuron population in dLGN. (B) Representative  $I_h$  recording from a TC neuron in dLGN is shown. The inset shows the voltage clamp protocol. (C) The mean steady-state activation curve from TC neurons is shown. The solid line represents the best approximation of a Boltzmann function to the data points. (D) Box plots of  $V_h$  values under control conditions (con) with cAMP (10  $\mu$ M), cGMP (10  $\mu$ M) or PIP<sub>2</sub> (10  $\mu$ M) included to the pipette solution of independent populations of TC neurons are shown (one way ANOVA:  $F = 55.93$ ,  $p < 0.001$ ; Tukey's posthoc: con vs. cAMP,  $p < 0.001$ ; con vs. cGMP,  $p < 0.001$ ). The inset shows representative current traces from a TC neuron in the presence of 10  $\mu$ M intracellular cAMP. Scale bars represent 2s and 200 pA. (E, F) Box plots of  $I_h$  current density determined at -130 mV (E) and time constants of activation (F) in TC neurons are shown.

### C) Supplementary Tables

**Table S1.** Electrophysiological parameters (mean  $\pm$  SEM) of dLGN IN recorded from GAD67-EGFP mice.

| Parameter                                              | Small             | Large             | t-test P-value |
|--------------------------------------------------------|-------------------|-------------------|----------------|
| number of cells                                        | 125               | 103               |                |
| $V_{\text{sag}} = V_{\text{max}} - V_{\text{ss}}$ [mV] | 8.12 $\pm$ 0.27   | 4.23 $\pm$ 0.27   | P < 0.001 ***  |
| <u>relative <math>V_{\text{sag}}</math> [%]</u>        | 8.56 $\pm$ 0.29   | 4.56 $\pm$ 0.29   | P < 0.001 ***  |
| $R_{\text{in}}$ [G $\Omega$ ]                          | 0.40 $\pm$ 0.01   | 0.33 $\pm$ 0.02   | P = 0.001 **   |
| $\tau_m$ [ms]                                          | 26.96 $\pm$ 1.04  | 43.76 $\pm$ 2.20  | P < 0.001 ***  |
| <u><math>C_m</math> [pF]</u>                           | 69.52 $\pm$ 1.94  | 132.73 $\pm$ 3.17 | P < 0.001 ***  |
| $V_{\text{sag}}/C_m$ [ $\mu$ V/pF]                     | 130.57 $\pm$ 6.88 | 33.31 $\pm$ 2.02  | P < 0.001 ***  |
| <u>RMP [mV]</u>                                        | -62.36 $\pm$ 0.57 | -64.88 $\pm$ 0.66 | P = 0.004 **   |
| <u><math>V_{\text{thresh}}</math> [mV]</u>             | -35.37 $\pm$ 0.45 | -35.41 $\pm$ 0.45 | n. s.          |
| <u>Dur [ms]</u>                                        | 1.91 $\pm$ 0.08   | 2.20 $\pm$ 0.07   | P = 0.008 **   |
| <u>Integr [<math>\mu</math>Vs]</u>                     | 30.14 $\pm$ 1.17  | 35.82 $\pm$ 1.39  | P = 0.002 **   |
| MaxY [mV]                                              | 19.55 $\pm$ 1.19  | 19.28 $\pm$ 1.19  | n. s.          |
| MAXdt [ms]                                             | 1.10 $\pm$ 0.06   | 1.33 $\pm$ 0.06   | P = 0.008 **   |
| Depolarization rate [V/s]                              | 68.74 $\pm$ 3.98  | 53.73 $\pm$ 3.26  | P = 0.005 **   |
| MinY [mV]                                              | -45.16 $\pm$ 0.47 | -43.05 $\pm$ 0.56 | P = 0.004 **   |
| <u>MINdt [ms]</u>                                      | 3.20 $\pm$ 0.10   | 3.83 $\pm$ 0.12   | P < 0.001 ***  |
| Repolarization rate [V/s]                              | 22.52 $\pm$ 0.85  | 18.06 $\pm$ 0.69  | P < 0.001 ***  |
| Firing rate @ 30 pA [Hz]                               | 4.19 $\pm$ 0.68   | 0.40 $\pm$ 0.15   | P < 0.001 ***  |
| Firing rate @ 80 pA [Hz]                               | 10.41 $\pm$ 1.05  | 2.02 $\pm$ 0.35   | P < 0.001 ***  |
| Firing rate @ 130 pA [Hz]                              | 11.08 $\pm$ 1.19  | 3.20 $\pm$ 0.43   | P < 0.001 ***  |

The assignment to the groups of small and large IN was done based on k-mean correction using the underlined set of parameters ( $C_m$ , RMP, relative  $V_{\text{sag}}$ ,  $V_{\text{thresh}}$ , MINdt, Dur, Integr).
